# Supplementary material
Source: MDPI journal article supplement (https://www.mdpi.com/2311-5637/9/10/889)
Supplement: s1 [file s1]

**Table S1. Potential selected and identified significant metabolites in *saeu-jeot* samples collected at different fermentation periods.**

| Name                     | Estimated $m/z$<br>charge | Retention time<br>(min) | Chemical<br>formula                                           | ESI* | Adducts | CV<br>(%)** |
|--------------------------|---------------------------|-------------------------|---------------------------------------------------------------|------|---------|-------------|
| <i>Organic acids</i>     |                           |                         |                                                               |      |         |             |
| Lactic acid              | 89.0250                   | 4.28                    | C <sub>3</sub> H <sub>6</sub> O <sub>3</sub>                  | –    | M - H   | 0.08        |
| Fumaric acid             | 115.0036                  | 12.00                   | C <sub>4</sub> H <sub>4</sub> O <sub>4</sub>                  | –    | M - H   | 0.06        |
| Malic acid               | 133.0153                  | 3.72                    | C <sub>4</sub> H <sub>6</sub> O <sub>5</sub>                  | –    | M - H   | 0.08        |
| Gluconic acid            | 195.0431                  | 5.57                    | C <sub>6</sub> H <sub>12</sub> O <sub>7</sub>                 | –    | M - H   | 0.12        |
| <i>Amino acids</i>       |                           |                         |                                                               |      |         |             |
| Alanine                  | 88.0409                   | 12.42                   | C <sub>3</sub> H <sub>7</sub> NO <sub>2</sub>                 | –    | M - H   | 0.15        |
| Pyroglutamic acid        | 128.0351                  | 5.57                    | C <sub>5</sub> H <sub>7</sub> NO <sub>3</sub>                 | –    | M - H   | 0.11        |
| Asparagine               | 131.0460                  | 9.67                    | C <sub>4</sub> H <sub>8</sub> N <sub>2</sub> O <sub>3</sub>   | –    | M - H   | 0.05        |
| Isoleucine               | 130.0871                  | 4.31                    | C <sub>6</sub> H <sub>13</sub> NO <sub>2</sub>                | –    | M - H   | 0.05        |
| Aspartic acid            | 132.0300                  | 12.00                   | C <sub>4</sub> H <sub>7</sub> NO <sub>4</sub>                 | –    | M - H   | 0.02        |
| Histidine                | 154.0616                  | 9.81                    | C <sub>6</sub> H <sub>9</sub> N <sub>3</sub> O <sub>2</sub>   | –    | M - H   | 0.12        |
| Tyrosine                 | 180.0656                  | 5.15                    | C <sub>9</sub> H <sub>11</sub> NO <sub>3</sub>                | –    | M - H   | 0.11        |
| Tryptophan               | 203.0815                  | 4.00                    | C <sub>11</sub> H <sub>12</sub> N <sub>2</sub> O <sub>2</sub> | –    | M - H   | 0.04        |
| <i>Other metabolites</i> |                           |                         |                                                               |      |         |             |
| Histamine                | 110.0725                  | 9.78                    | C <sub>5</sub> H <sub>9</sub> N <sub>3</sub>                  | –    | M - H   | 0.30        |
| Ornithine                | 131.0824                  | 10.93                   | C <sub>5</sub> H <sub>12</sub> N <sub>2</sub> O <sub>2</sub>  | –    | M - H   | 0.07        |
| Guanine                  | 150.0417                  | 3.72                    | C <sub>5</sub> H <sub>5</sub> N <sub>5</sub> O                | –    | M - H   | 0.04        |
| N-Acetylserotonin        | 219.1004                  | 11.84                   | C <sub>12</sub> H <sub>14</sub> N <sub>2</sub> O <sub>2</sub> | +    | M + H   | 0.07        |

\*ESI: electrospray ionization

\*\*CV, coefficient of variance

**Table S2. Change in BA concentrations in *saeu-jeot* samples collected at different fermentation periods.**

| Fermentation<br>period<br>(days) | TRP<br>(mg/kg) | PUT<br>(mg/kg) | CAD<br>(mg/kg) | HIS<br>(mg/kg) | SRT<br>(mg/kg) | TYR<br>(mg/kg) | SPD<br>(mg/kg) | NOR<br>(mg/kg) | DOP<br>(mg/kg) | SP<br>(mg/kg) | Total BA<br>(mg/kg) |
|----------------------------------|----------------|----------------|----------------|----------------|----------------|----------------|----------------|----------------|----------------|---------------|---------------------|
| 15                               | 1.24±0.00      | ND             | ND            | ND                  |
| 30                               | 1.21±0.00      | ND             | ND            | ND                  |
| 45                               | 1.16±0.01      | ND             | ND            | ND                  |
| 60                               | 1.26±0.04      | ND             | ND            | ND                  |
| 90                               | 1.35±0.00      | ND             | ND            | ND                  |
| 120                              | 1.23±0.01      | ND             | ND            | ND                  |
| 180                              | 1.32±0.01      | ND             | ND            | ND                  |
| 270                              | 1.25±0.00      | ND             | ND            | ND                  |
| 360                              | 1.33±0.00      | ND             | ND            | ND                  |
| LOD                              |                |                |                |                |                |                |                |                |                |               |                     |
| LOQ                              |                |                |                |                |                |                |                |                |                |               |                     |

**Abbreviations:** BA, biogenic amine; TRP, tryptamine; PUT, putrescine; CAD, cadaverine; HIS, histamine; SRT, serotonin; TYM, tyramine; SPD, spermidine; NOR, norepinephrine; DOP, dopamine hydrochloride; SP, spermine; ND, not detected; LOD, Limit of detection; LOQ, limit of quantification.

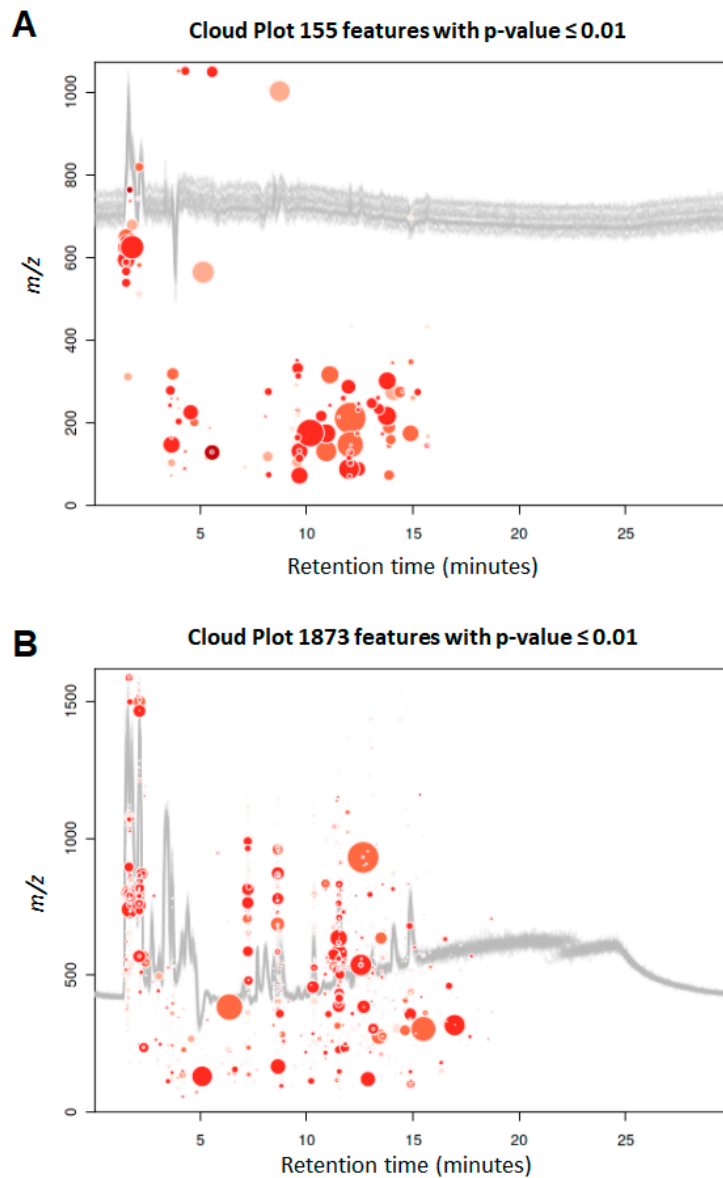

**Figure S1.** Cloud plot of chemical fingerprinting from multigroup analysis using XCMS Online software at different periods of *saeu-jeot* fermentation. Results from multigroup analysis using XCMS Online software are shown here. (A) Negative and (B) positive ionization modes.
